# Supplementary material
Source: PubMed Central journal article supplement (PMC3479598)
Supplement: 1206205109_pnas.201206205SI.pdf [file 1206205109_pnas.201206205SI.pdf]

# Supporting Information

Mallarino et al. 10.1073/pnas.1206205109

## SI Materials and Methods

**Phylogenetic Reconstruction.** Species sampled for phylogenetic analyses included representative Darwin's finches and all 13 of the non-Darwin's finches belonging to Tholospiza. We included between one and four individuals of each species and used sequences from two mitochondrial and four nuclear markers. We included mitochondrial cytochrome *b* (*cyt b*) sequences for all species, and mitochondrial nicotinamide dehydrogenase subunit 2 (ND 2) sequences for all but four species. For an additional seven species (*Coereba flaveola*, *Euneornis campestris*, *Loxigilla noctis*, *Loxipasser anoxanthus*, *Melopyrrha nigra*, *Tiaris bicolor*, and *Tiaris olivacea*), we included sequences from three autosomal nuclear markers:  $\beta$ -fibrinogen intron 5 (FGB-I5), myoglobin intron 2 (MB-I2), and recombination-activating gene (RAG-1); and a sequence from a marker linked to the avian Z sex chromosome: aconitase 1 intron 10 (ACO1-I10). GenBank accession numbers for the sequences reported here are HQ153049–HQ153089 (new to this study) and AF108772, AF108777, AF108791, AF108792, AF108796, AF108802, AF108806–AF108808, AF281024, AF290115, AF310041–AF310043, AF382993, AF383109, AF447282, AF447310, AF489885–AF489901, AY005219, EF567837, EU648036, EU648044–EU648046, and EU648107 (1–10). Locality and voucher information are reported in the GenBank records. For *L. noctis*, samples from Barbados, Dominica, and St. Lucia were included, because the subspecies of *L. noctis* that occurs on Barbados was recently split into a separate species (11). Sequences of the individuals from different islands were  $\sim 1\%$  different from each other and formed a monophyletic clade; they are treated as a single branch labeled *L. noctis* on Fig. 1A. Methods of DNA isolation, amplification, and sequencing followed standard protocols (12). Phylogenetic analyses were performed using maximum-likelihood (ML) and Bayesian inference methods. The ML and Bayesian analysis produced largely concordant topologies, and neither analysis produced a strongly supported node that conflicted with a strongly supported node in the other analysis (ML tree is shown in Fig. 1A).

Phylogenetic analyses were conducted on the ABE TeraGrid, accessed via the CIPRES portal v2.2 (13). ML was implemented using RAxML v7.2.6 (14, 15), which applies the GTR +  $\Gamma$  model to each partition. Analyses were conducted using the concatenated data with 12 partitions: each protein-coding gene (*cyt b*, ND 2, and RAG-1) was partitioned by codon position, and the three introns (ACO1-I10, FGB-I5, and MB-I2) were each placed into a separate partition. The most likely tree was computed, and 1,000 bootstrap replicates were performed to assess support for each node. Bootstrap values greater than 70% were considered strongly supported. Bayesian analyses were implemented using MrBayes v3.1.2 (16, 17) with the 12 partitions described above, and the GTR + I +  $\Gamma$  model applied to each partition. The analysis was run twice independently, with each run for 5 million generations, and sampled every 500 generations. The log-likelihood values from each run were plotted against the number of generations using Tracer v1.4 (18) to determine the point at which stationarity was reached. Both runs reached stationarity well before 100,000 generations, and we thus chose a burn-in of 500,000 generations for each. Results of each analysis were compared, and the same topology and similar posterior probabilities were recovered. Thus, all of the post-burn-in trees were used to construct a consensus tree. Posterior probabilities of 0.95 and higher were considered strongly supported. We reconstructed the history of beak shape evolution on the ML and Bayesian trees using Mesquite v2.73 (19). Reconstructions were performed using both ML (under the Markov k-state 1 parameter

model) and parsimony. All of these reconstructions showed that the best explanation for the pattern seen in *Loxigilla* beak shape (group D) is that it evolved convergently in the two *Loxigilla* lineages (ML reconstruction on ML tree is shown in Fig. S2).

Because we were particularly interested in the lack of monophyly of species in the genus *Loxigilla*, we conducted additional Bayesian analyses in which we enforced the monophyly of *Loxigilla*. These analyses were conducted under the same conditions as above, with the exception that we constrained *Loxigilla* to be monophyletic. Results of these constrained analyses were compared with the unconstrained analyses and evaluated using the Bayes factor test of incongruence (20). Lack of monophyly for *Loxigilla* was strongly supported by three lines of evidence. First, our trees have high posterior probabilities and bootstrap support values for nodes that would preclude *Loxigilla* monophyly. Second, *Loxigilla* was not monophyletic in any of the trees in our 95% credible set of trees in the Bayesian analysis. Last, using the Bayes Factor criterion (20), trees in which *Loxigilla* is monophyletic are a worse explanation of the data than those we recovered in our unconstrained searches. Twice the difference in harmonic means between our unconstrained searches and those constrained to have *Loxigilla* monophyly yielded a value of 93.2, well above the threshold of 20 (20) required for strong evidence against a hypothesis of *Loxigilla* monophyly.

The following institutions provided tissues for phylogeny reconstruction: American Museum of Natural History, Field Museum of Natural History, Louisiana State University Museum of Natural Science, the Museum of Vertebrate Zoology at the University of California (Berkeley), and the Smithsonian Tropical Research Institute.

**Beak Shape Analysis.** The birds used for this analysis were obtained from the Museum of Comparative Zoology at Harvard University. Lateral pictures of each species were taken using a Nikon D90 camera, and the outline of the beak was determined with a feature detection program (SteerableJ in ImageJ). Three specimens were used per species. To determine whether two given (upper) beak shapes,  $y_1(x)$  and  $y_2(x)$ , were related by a scaling transformation, we used the same methods described previously in Campàs et al. (21). Let  $T_{s_l, s_d}[y_2(x)]$  denote the transformed shape (in which the length and the depth are scaled by  $s_l$  and  $s_d$  respectively;  $s_l$  and  $s_d$  being thus the scaling factors in the length and depth directions, respectively), and then consider the differences  $E_s(s_l, s_d) \equiv \|y_1(x) - T_{s_l, s_d}[y_2(x)]\|$  and  $E_d(s_l, s_d) \equiv \|y_1'(x) - T_{s_l, s_d}[y_2'(x)]\|$ , where  $y'(x)$  corresponds to the derivative of the shape along the length axis  $x$ , and  $\|\cdot\|$  denotes a distance metric. Thus,  $E_s$  and  $E_d$  measure, respectively, how different the shapes and their derivatives are as a function of the scaling factors  $s_l$  and  $s_d$ . We then asked whether there exist values  $s_l^*$  and  $s_d^*$  for which both measures  $E_s$  and  $E_d$  have a global minimum. The distance metric used to measure the differences between shapes is defined by  $\|z_1(x) - z_2(x)\| \equiv \sqrt{\int_0^{s_m} dx (z_1(x) - T_{s_l, s_d}[z_2(x)])^2 + \int_0^{s_m} dx (z_1(x) + T_{s_l, s_d}[z_2(x)])^2}$

where  $z_1(x)$  and  $z_2(x)$  are real functions. See Campàs et al. (21) for more details.

**In Situ Hybridization and Immunohistochemistry.** In situ hybridizations, antibody stains, alkaline phosphatase assays, and quantification of gene expression were performed as described previously (22). For immunostaining, we used anti-*TGF $\beta$ 11r* (sc-400; Santa Cruz) and anti- $\beta$ -*caterin* (610153; BD Transduction Laboratories) antibodies using methods described previously (22). Both of these antibodies have been previously used in

Darwin's finches (22) and are fully expected to cross-react with *Loxigilla* because they have been shown to cross-react across many different taxa ( $\beta$ -catenin: chicken, dog, mouse, and rat [BD Transduction Laboratories]; *TGF $\beta$ IIr*: avians, dog, mouse, rat, pig, and sheep [Santa Cruz Biotechnology]). In situ hybridizations were carried using chicken mRNA probes as described previously (22–24). To confirm that absence of gene expression in the beak of any given species is not due to tissue degradation or to probe binding/specificity issues, we sequenced cDNA for regions corresponding to the probe-binding domains of *Bmp4*, *CaM*, *Dkk3*, and *Ihh*, and found high values of sequence conservation between *Loxigilla* (which did not vary between species) and chicken (*Bmp4*: 95%; *CaM*: 93%; *Dkk3*: 92%; *Ihh*: 95%). Thus, as shown previously with Darwin's finches (22–24), chicken probes are adequate for assessing gene expression in *Loxigilla* species. In addition, in our methodology, if a gene is not expressed in the beak region of a species, we check for its expression in other tissues within the same embryo (e.g., brain, cranial base, and the back of the head; Fig. S9).

**Quantitative PCR.** Quantitative PCR (qPCR) in chicken embryos was performed using methods and primers described previously (22). For qPCR expression assays in *Loxigilla*, we used the frontal nasal primordia from *L. noctis* and *Loxigilla violacea* embryos corresponding to the Hamburger–Hamilton stage 26 ( $n = 3$  individuals per species). RNA was treated with TURBO DNase (Applied Biosystems); cDNA was generated using the

high-capacity RNA-to-cDNA Kit (Applied Biosystems); and qPCR was performed using the SYBR green protocol (Kapa Biosystems). Forty cycles of amplification were used, and data acquisition was carried out with an Eppendorf Mastercycler. We assayed expression of *Bmp4*, *CaM*, and *Col2a1* using primers designed against regions conserved between *Loxigilla* species (see below). Because our embryo collection quotas are very strict, we did not have embryos from later stages to assess genes expressed at stage 30 (i.e., *TGF $\beta$ IIr*,  $\beta$ -catenin, *Dkk3*, and *Ihh*) through qPCR. In addition, due to insufficient samples, we were not able to include *Loxigilla portoricensis* in the analysis; however, we believe this is not critical because *L. noctis* and *L. violacea* are representative of the two different developmental programs reported in the article. Gene expression was assayed in triplicate for each sample and normalized for GAPDH. Data from all qPCR experiments were analyzed using the comparative threshold cycle (CT) method (25), and statistical significance of expression differences was established using a standard two-tailed Student *t* test. Primers used for qPCR in *Loxigilla* include *Bmp4* [*Bmp4*-F1 (5'- GATTCCTGGTAACCGAATGCT-3'), *Bmp4*-R1 (5'- CCACCTGTGCATACTCATCCA-3')]; calmodulin [*CaM*-F1 (5'- GAGGCAAATCGTGCCATAAGCAGA-3'), *CaM*-R1 (5'- GACGATTGACAGTCAACAATATGA-3')]; and collagen 2a1 [*Col2a1*-F1 (5'-AAAGGACAGACGGGCGAACC-3'), *Col2a1*-R1 (5'- GCTCTCCGGGACGGCCAGGGT-3')].

1. Bellemain E, Bermingham E, Ricklefs RE (2008) The dynamic evolutionary history of the bananaquit (*Coereba flaveola*) in the Caribbean revealed by a multigene analysis. *BMC Evol Biol* 8:240–253.
2. Burns KJ, Hackett SJ, Klein NK (2002) Phylogenetic relationships and morphological diversity in Darwin's finches and their relatives. *Evolution* 56:1240–1252.
3. Klicka J, Johnson KP, Lanyon SM (2000) New world nine-primaried oscine relationships: Constructing a mitochondrial DNA framework. *Auk* 117:321–336.
4. Loughheed SC, Freeland JR, Handford P, Boag PT (2000) A molecular phylogeny of warbling-finches (*Poospiza*): Paraphyly in a neotropical Emberizid genus. *Mol Phylogenet Evol* 17:367–378.
5. Lovette IJ, Bermingham E (2000) c-mos variation in songbirds: Molecular evolution, phylogenetic implications, and comparisons with mitochondrial differentiation. *Mol Biol Evol* 17:1569–1577.
6. Lovette IJ, Bermingham E (2002) What is a wood-warbler? Molecular characterization of a monophyletic Parulidae. *Auk* 119:695–714.
7. Sato A, et al. (1999) Phylogeny of Darwin's finches as revealed by mtDNA sequences. *Proc Natl Acad Sci USA* 96:5101–5106.
8. Sato A, et al. (2001) On the origin of Darwin's finches. *Mol Biol Evol* 18:299–311.
9. Sedano RE, Burns KJ (2010) Are the Northern Andes a species pump for Neotropical birds? Phylogenetics and biogeography of a clade of Neotropical tanagers (Aves: Thraupini). *J Biogeogr* 37:325–343.
10. Yuri T, Mindell DP (2002) Molecular phylogenetic analysis of Fringillidae, "New World nine-primaried oscines" (Aves: Passeriformes). *Mol Phylogenet Evol* 23:229–243.
11. Banks RC, et al. (2006) Forty-seventh supplement to the American Ornithologists' Union Check-list of North American birds. *Auk* 123:926–936.
12. Burns KJ, Raciocot RA (2009) Molecular phylogenetics of a clade of lowland tanagers: Implications for avian participation in the Great American Interchange. *Auk* 126:635–648.
13. Miller MA, Holder MT, Vos R, Midford PE, Liebowitz T, et al. (2009) Cyberinfrastructure for Phylogenetic Research (CIPRES). Available at [www.phylo.org](http://www.phylo.org).
14. Stamatakis A (2006) RAXML-VI-HPC: Maximum likelihood-based phylogenetic analyses with thousands of taxa and mixed models. *Bioinformatics* 22:2688–2690.
15. Stamatakis A, Hoover P, Rougemont J (2008) A rapid bootstrap algorithm for the RAXML Web servers. *Syst Biol* 57:758–771.
16. Huelsenbeck JP, Ronquist F (2001) MRBAYES: Bayesian inference of phylogenetic trees. *Bioinformatics* 17:754–755.
17. Ronquist F, Huelsenbeck JP (2003) MrBayes 3: Bayesian phylogenetic inference under mixed models. *Bioinformatics* 19:1572–1574.
18. Rambaut A, Drummond A (2003) Tracer, v1.3. Available at <http://tree.bio.ed.ac.uk/software/tracer/>.
19. Maddison WP, Maddison DR (2010) Mesquite: A modular system for evolutionary analysis, v2.73. Available at <http://mesquiteproject.org/>.
20. Kass RE, Raftery AE (1995) Bayes factors. *J Am Stat Assoc* 90:377–395.
21. Campàs O, Mallarino R, Herrel A, Abzhanov A, Brenner MP (2010) Scaling and shear transformations capture beak shape variation in Darwin's finches. *Proc Natl Acad Sci USA* 107:3356–3360.
22. Mallarino R, et al. (2011) Two developmental modules establish 3D beak-shape variation in Darwin's finches. *Proc Natl Acad Sci USA* 108:4057–4062.
23. Abzhanov A, Protas M, Grant BR, Grant PR, Tabin CJ (2004) *Bmp4* and morphological variation of beaks in Darwin's finches. *Science* 305:1462–1465.
24. Abzhanov A, et al. (2006) The calmodulin pathway and evolution of elongated beak morphology in Darwin's finches. *Nature* 442:563–567.
25. Livak KJ, Schmittgen TD (2001) Analysis of relative gene expression data using real-time quantitative PCR and the 2(-Delta Delta C(T)) method. *Methods* 25:402–408.
